# Supplementary material
Source: PubMed Central journal article supplement (PMC3040256)
Supplement: NIHMS266741-supplement-1_si_001.pdf [file NIHMS266741-supplement-1_si_001.pdf]

**Figure S1:** The amino acid of sequence of tau highlighting the location of Lys (K, bold) and Tyr (Y, gray).

1 MAEPRQEFVMEHDHAGT<sup>18</sup>YGLGDR**K**DQGG<sup>29</sup>YTMHQDQEGDTDA  
42 GL**K**ESPLQTPTEGSEEPGSETSDA**K**STPTAEDVTAPLVDEGA  
85 PG**K**QAAAQPHTEIPEGTTAEEAGIGDTPSLEDEAAGHVVTQARM  
128 V**S****K****S**KDGTGSDD**K****K**A**K**GADG**K**T**K**IATPRGAAPP**G****K**GQANAT  
170 R**I**PA**K**TP**P**AP**K**TP**P**SSG**E**PP**K**SGDRSG<sup>197</sup>YSSPGSPGTPGSR**S**R**T**  
213 PSLPT**P**PTREP**K****K**VAVV**R**TP**P****K**SPSSA**K**SRLQTAPVPMPDL**K****N**  
256 V**K****S**KIGSTENL**K**HQPGGG**K**VQI**I****N****K****K**LDLSNVQ**S****K**CG**S****K**DN**I****K**H  
300 VPGGGSVQIV<sup>310</sup>**Y****K**PV**D**LS**K**V**T****S****K**CGSLGNIHH**K**PGGGQVEV**K**SE  
343 **K**LDF**K**DRVQ**S**KIGSLDNITHVPGGGN**K****K**IETH**K**LTFRENA**K**A**K**T  
387 DHGAEIV<sup>394</sup>**Y****K**SPVVSGDTSRHL**S**NVSS**T**GSIDMVDSPQLATLAD  
431 EVSASLA**K**QGL
